# Supplementary material
Source: PubMed Central journal article supplement (PMC5519142)
Supplement: NIHMS777754-supplement-Permission_for_Fig_4.pdf [file NIHMS777754-supplement-Permission_for_Fig_4.pdf]

# CAMBRIDGE UNIVERSITY PRESS LICENSE TERMS AND CONDITIONS

Apr 11, 2016

This Agreement between Ariane Marelli ("You") and Cambridge University Press ("Cambridge University Press") consists of your license details and the terms and conditions provided by Cambridge University Press and Copyright Clearance Center.

**All payments must be made in full to CCC. For payment instructions, please see information listed at the bottom of this form.**

|                                          |                                                                                                                                              |
|------------------------------------------|----------------------------------------------------------------------------------------------------------------------------------------------|
| License Number                           | 3816070086851                                                                                                                                |
| License date                             | Feb 25, 2016                                                                                                                                 |
| Licensed Content Publisher               | Cambridge University Press                                                                                                                   |
| Licensed Content Publication             | Cardiology in the Young                                                                                                                      |
| Licensed Content Title                   | Current insights regarding neurological and developmental abnormalities in children and young adults with complex congenital cardiac disease |
| Licensed Content Author                  | Gil Wernovsky                                                                                                                                |
| Licensed Content Date                    | Jan 10, 2006                                                                                                                                 |
| Licensed Content Volume Number           | 16                                                                                                                                           |
| Licensed Content Issue Number            | S1                                                                                                                                           |
| Start page                               | 92                                                                                                                                           |
| End page                                 | 104                                                                                                                                          |
| Type of Use                              | Journal/Magazine                                                                                                                             |
| Requestor type                           | Publisher                                                                                                                                    |
| Requestor details                        | Not-for-profit                                                                                                                               |
| Format                                   | Print and electronic                                                                                                                         |
| Portion                                  | Figure/table                                                                                                                                 |
| Number of figures/tables                 | 1                                                                                                                                            |
| Order reference number                   | None                                                                                                                                         |
| Territory for reuse                      | World                                                                                                                                        |
| Title of new article                     | The Brain in Congenital Heart Disease across the Lifespan: The Cumulative Burden of Injury                                                   |
| Publication the new article is in        | Circulation                                                                                                                                  |
| Publisher of new article                 | American Heart Association                                                                                                                   |
| Author of new article                    | Ariane Marelli, Steven P. Miller, Bradley Scott Marino, Angela L. Jefferson, Jane W. Newburger                                               |
| Expected publication date of new article | Feb 2016                                                                                                                                     |
| Estimated size of new article (pages)    | 5                                                                                                                                            |
| Requestor Location                       | Ariane Marelli<br>1001 Decarie Boulevard<br>None<br>None                                                                                     |

Montreal, QC H4A 3J1  
 Canada  
 Attn: Ariane Marelli

**Billing Type**

Invoice

**Billing Address**

Ariane Marelli  
 1001 Decarie Boulevard  
 McGill University Health Center  
 Room C 04.4182  
 Montreal, QC H4A 3J1  
 Canada  
 Attn: Ariane Marelli

**Total****108.91 CAD****Terms and Conditions****TERMS & CONDITIONS**

Cambridge University Press grants the Licensee permission on a non-exclusive non-transferable basis to reproduce, make available or otherwise use the Licensed content 'Content' in the named territory 'Territory' for the purpose listed 'the Use' on Page 1 of this Agreement subject to the following terms and conditions.

1. The permission granted is not valid until the Licensee has paid in full.
2. The License is limited to the permission granted and the Content detailed herein and does not extend to any other permission or content.
3. Cambridge gives no warranty or indemnity in respect of any third-party copyright material included in the Content, for which the Licensee should seek separate permission clearance.
4. The integrity of the Content must be ensured.
5. The License does extend to any edition published specifically for the use of handicapped or reading-impaired individuals.
6. The Licensee shall provide a prominent acknowledgement in the following format:  
 author/s, title of article, name of journal, volume number, issue number, page references, , reproduced with permission.

If author's own material and free of charge then condition 1 to be removed.

Other terms and conditions:

v1.0

**You will be invoiced within 48 hours of this transaction date. You may pay your invoice by credit card upon receipt of the invoice for this transaction. Please follow instructions provided at that time.**

**To pay for this transaction now; please remit a copy of this document along with your payment. Payment should be in the form of a check or money order referencing your account number and this invoice number RLNK501869821.**

**Make payments to "COPYRIGHT CLEARANCE CENTER" and send to:**

**Copyright Clearance Center**

**Dept 001**

**P.O. Box 843006**

**Boston, MA 02284-3006**

**Please disregard electronic and mailed copies if you remit payment in advance**

**Questions? [customercare@copyright.com](mailto:customercare@copyright.com) or +1-855-239-3415 (toll free in the US) or +1-978-646-2777.**
