# Supplementary material
Source: PubMed Central journal article supplement (PMC5519142)
Supplement: NIHMS777754-supplement-Permission_for_Fig_5.pdf [file NIHMS777754-supplement-Permission_for_Fig_5.pdf]

# WOLTERS KLUWER HEALTH, INC. LICENSE TERMS AND CONDITIONS

Apr 11, 2016

This Agreement between Ariane Marelli ("You") and Wolters Kluwer Health, Inc. ("Wolters Kluwer Health, Inc.") consists of your license details and the terms and conditions provided by Wolters Kluwer Health, Inc. and Copyright Clearance Center.

**All payments must be made in full to CCC. For payment instructions, please see information listed at the bottom of this form.**

|                                          |                                                                                                |
|------------------------------------------|------------------------------------------------------------------------------------------------|
| License Number                           | 3797220562502                                                                                  |
| License date                             | Jan 27, 2016                                                                                   |
| Licensed Content Publisher               | Wolters Kluwer Health, Inc.                                                                    |
| Licensed Content Publication             | Circulation                                                                                    |
| Licensed Content Title                   | Vascular Risk Factors and Midlife Cognition: Rethinking the Exposure Window                    |
| Licensed Content Author                  | Angela L. Jefferson                                                                            |
| Licensed Content Date                    | Apr 15, 2014                                                                                   |
| Licensed Content Volume Number           | 129                                                                                            |
| Licensed Content Issue Number            | 15                                                                                             |
| Type of Use                              | Journal/Magazine                                                                               |
| Requestor type                           | Not-for-profit                                                                                 |
| Format                                   | Print and electronic                                                                           |
| Portion                                  | Figures/table/illustration                                                                     |
| Number of figures/tables/illustrations   | 1                                                                                              |
| Figures/tables/illustrations used        | Figure                                                                                         |
| Author of this Wolters Kluwer article    | No                                                                                             |
| Will you be translating?                 | No                                                                                             |
| Number of copies                         | 23900                                                                                          |
| Title of new article                     | The Brain in Congenital Heart Disease across the Lifespan: The Cumulative Burden of Injury     |
| Publication the new article is in        | Circulation                                                                                    |
| Publisher of new article                 | American Heart Association                                                                     |
| Author of new article                    | Ariane Marelli, Steven P. Miller, Bradley Scott Marino, Angela L. Jefferson, Jane W. Newburger |
| Expected publication date of new article | Feb 2016                                                                                       |
| Estimated size of new article (pages)    | 5                                                                                              |
| Requestor Location                       | Ariane Marelli<br>1001 Decarie Boulevard                                                       |

None  
None  
Montreal, QC H4A 3J1  
Canada  
Attn: Ariane Marelli  
Invoice  
Billing Type  
Billing Address  
Ariane Marelli  
1001 Decarie Boulevard  
McGill University Health Center  
Room C 04.4182  
Montreal, QC H4A 3J1  
Canada  
Attn: Ariane Marelli  
Total  
**162.52 CAD**  
Terms and Conditions

### **Terms and conditions Wolters Kluwer Health**

1. **Transfer of License:** Wolters Kluwer hereby grants you a non-exclusive license to reproduce this material for this purpose, and for no other use, subject to the conditions herein
2. **Credit Line:** A credit line will be prominently placed, wherever the material is reused and include: the author(s), title of article, title of journal, volume number, issue number and inclusive pages.  
**Where a journal is being published by a learned society, the details of that society must be included in the credit line.**
  - i. **for Open access journals:** The following statement needs to be added when reprinting the material in Open Access journals only: 'promotional and commercial use of the material in print, digital or mobile device format is prohibited without the permission from the publisher Wolters Kluwer Health. Please contact [healthpermissions@wolterskluwer.com](mailto:healthpermissions@wolterskluwer.com) for further information
3. **Exceptions:** In case of *Disease Colon Rectum, Plastic Reconstructive Surgery, The Green Journal, Critical care Medicine, Pediatric Critical Care Medicine, the American Heart Publications, the American Academy of Neurology* the following guideline applies: no drug/ trade name or logo can be included in the same page as the material re-used.
4. **Translations:** When requesting a permission to translate a full text article, Wolters Kluwer/ Lippincott Williams & Wilkins request to receive the pdf of the translated document. This disclaimer should be added at all times:  
***Wolters Kluwer Health and its Societies take no responsibility for the accuracy of the translation from the published English original and are not liable for any errors which may occur.***
5. **Warranties** The requestor warrants that the material shall not be used in any manner which may be considered derogatory to the title, content, or authors of the material, or to Wolters Kluwer
6. **Indemnity:** You hereby indemnify and hold harmless Wolters Kluwer and their respective officers, directors, employees and agents, from and against any and all claims, costs, proceeding or demands arising out of your unauthorised use of the Licensed Material.
7. **Geographical Scope:** Permission granted is valid worldwide in the English language and the languages specified in your original request
8. Wolters Kluwer cannot supply the requestor with the original artwork or a "clean copy."
9. Permission is valid if the borrowed material is original to a Wolters Kluwer imprint (Lippincott-Raven Publishers, Williams & Wilkins, Lea & Febiger, Harwal, Rapid Science, Little Brown & Company, Harper & Row Medical, American Journal of Nursing Co, and Urban & Schwarzenberg)
10. **Termination of contract:** If you opt not to use the material requested above please notify RightsLink or Wolters Kluwer Health/ Lippincott Williams & Wilkins within 90 days of the original invoice date.
11. This permission does not apply to **images** that are credited to publications other than Wolters Kluwer journals. For images credited to non-Wolters Kluwer Health journal publications, you will need to obtain permission from the journal referenced in the figure or table legend or credit line before making any use of image(s) or table(s)
12. **Third party material:** Adaptations are protected by copyright, so if you would like to reuse material that we have adapted from another source, you will need not only our permission, but the permission of the rights holder of the original material. Similarly, if you want to reuse an adaptation of original LWW content that appears in another publishers work, you will need our permission and that of the next publisher. The adaptation should be credited as

follows: Adapted with permission from Wolters Kluwer Health: Book author, title, year of publication or Journal name, article author, title, reference citation, year of publication.

13. **Altering or modifying material:** Please note that modification of text within figures or full- text article is strictly forbidden.
14. Please note that articles in the **ahead-of-print stage** of publication can be cited and the content may be re-used by including the date of access and the unique DOI number. Any final changes in manuscripts will be made at the time of print publication and will be reflected in the final electronic issue. Disclaimer: Articles appearing in the Published Ahead-of-Print section have been peer-reviewed and accepted for publication in the relevant journal and posted online before print publication. Articles appearing as publish ahead-of-print may contain statements, opinions, and information that have errors in facts, figures, or interpretation. Accordingly, Lippincott Williams & Wilkins, the editors and authors and their respective employees are not responsible or liable for the use of any such inaccurate or misleading data, opinion or information contained in the articles in this section.
15. **Duration of the license:**
  - i. Permission is granted for a one-time use only within 12 months from the date of this invoice. Rights herein do not apply to future reproductions, editors, revisions, or other derivative works. Once the 12- month term has expired, permission to renew must be submitted in writing.
  - ii. For content reused in another journal or book, in print or electronic format, the license is one-time use and lasts for the 1st edition of a book or for the life of the edition in case of journals.
  - iii. If your Permission Request is for use on a website (which is not a journal or a book), internet, intranet, or any publicly accessible site, you agree to remove the material from such site after 12 months or else renew your permission request.
16. **Contingent on payment:** *While you may exercise the rights licensed immediately upon issuance of the license at the end of the licensing process for the transaction, provided that you have disclosed complete and accurate details of your proposed use, no license is finally effective unless and until full payment is received from you (either by publisher or by CCC) as provided in CCC's Billing and Payment terms and conditions. If full payment is not received on a timely basis, then any license preliminarily granted shall be deemed automatically revoked and shall be void as if never granted. Further, in the event that you breach any of these terms and conditions or any of CCC's Billing and Payment terms and conditions, the license is automatically revoked and shall be void as if never granted. Use of materials as described in a revoked license, as well as any use of the materials beyond the scope of an unrevoked license, may constitute copyright infringement and publisher reserves the right to take any and all action to protect its copyright in the materials.*
17. **Waived permission fee:** If the permission fee for the requested use of our material has been waived in this instance, please be advised that your future requests for Wolters Kluwer materials may attract a fee on another occasion. Please always check with the Wolters Kluwer Permissions Team if in doubt [healthpermissions@wolterskluwer.com](mailto:healthpermissions@wolterskluwer.com)

#### **For Books only:**

18. Permission is granted for a one time use only. Rights herein do not apply to future reproductions, editions, revisions, or other derivative works.

#### **Service Description for Content Services**

Subject to these terms of use, any terms set forth on the particular order, and payment of the applicable fee, you may make the following uses of the ordered materials:

- **Content Rental:** You may access and view a single electronic copy of the materials ordered for the time period designated at the time the order is placed. Access to the materials will be provided through a dedicated content viewer or other portal, and access will be discontinued upon expiration of the designated time period. An order for Content Rental does not include any rights to print, download, save, create additional copies, to distribute or to reuse in any way the full text or parts of the materials.
- **Content Purchase:** You may access and download a single electronic copy of the materials ordered. Copies will be provided by email or by such other means as publisher may make available from time to time. An order for Content Purchase does not include any rights to create additional copies or to distribute copies of the materials.

The materials may be accessed and used only by the person who placed the Order or the person on whose behalf the order was placed and only in accordance with the terms included in the particular order.

**SPECIAL CASES:****1. For STM Signatories only, as agreed as part of the STM Guidelines**

Any permission granted for a particular edition will apply also to subsequent editions and for editions in other languages, provided such editions are for the work as a whole in situ and does not involve the separate exploitation of the permitted illustrations or excerpts.

Please click [here](#) to view the STM guidelines.

**Other Terms and Conditions:**

v1.13

**You will be invoiced within 48 hours of this transaction date. You may pay your invoice by credit card upon receipt of the invoice for this transaction. Please follow instructions provided at that time.**

**To pay for this transaction now; please remit a copy of this document along with your payment. Payment should be in the form of a check or money order referencing your account number and this invoice number RLNK501841806.**

**Make payments to "COPYRIGHT CLEARANCE CENTER" and send to:**

**Copyright Clearance Center**

**Dept 001**

**P.O. Box 843006**

**Boston, MA 02284-3006**

**Please disregard electronic and mailed copies if you remit payment in advance**

**Questions? [customercare@copyright.com](mailto:customercare@copyright.com) or +1-855-239-3415 (toll free in the US) or +1-978-646-2777.**

---

---
